# Supplementary material for: Osteoarthritic Subchondral Bone Release Exosomes That Promote Cartilage Degeneration
Source: PubMed Central journal article supplement (PMC7911822; doi:10.3390/cells10020251), 2021-01-28
Supplement: cells-10-00251-s001.pdf [file cells-10-00251-s001.pdf]

## Supplementary Materials and Figures:

| miRNA                                                                                                                                                                                                                                                                                                                                                                                                        | Sequence                      |
|--------------------------------------------------------------------------------------------------------------------------------------------------------------------------------------------------------------------------------------------------------------------------------------------------------------------------------------------------------------------------------------------------------------|-------------------------------|
|  <p>Copyright: © 2021 by the authors. Licensee MDPI, Basel, Switzerland. This article is an open access article distributed under the terms and conditions of the Creative Commons Attribution (CC BY) license (<a href="http://creativecommons.org/licenses/by/4.0/">http://creativecommons.org/licenses/by/4.0/</a>).</p> |                               |
| hsa-miR-92a-3p                                                                                                                                                                                                                                                                                                                                                                                               | 5'-UAUUGCACUUGUCCCGGCCUGU-3'  |
| hsa-miR-5087                                                                                                                                                                                                                                                                                                                                                                                                 | 5'-GGGUUUGUAGCUUUGCUGGCAUG-3' |
| hsa-miR-210-5p                                                                                                                                                                                                                                                                                                                                                                                               | 5'-AGCCCCUGCCCACCGCACACUG-3'  |
| hsa-miR-670                                                                                                                                                                                                                                                                                                                                                                                                  | 5'-GUCCCUGAGUGUAUGUGGUG-3'    |
| hsa-miR-4266                                                                                                                                                                                                                                                                                                                                                                                                 | 5'-CUAGGAGGCCUUGGCC-3'        |
| hsa-miR-135a-3p                                                                                                                                                                                                                                                                                                                                                                                              | 5'-UAUAGGGAUUGGAGCCGUGGCG-3'  |

Table Supplementary Table 1. miRNA primers sequence

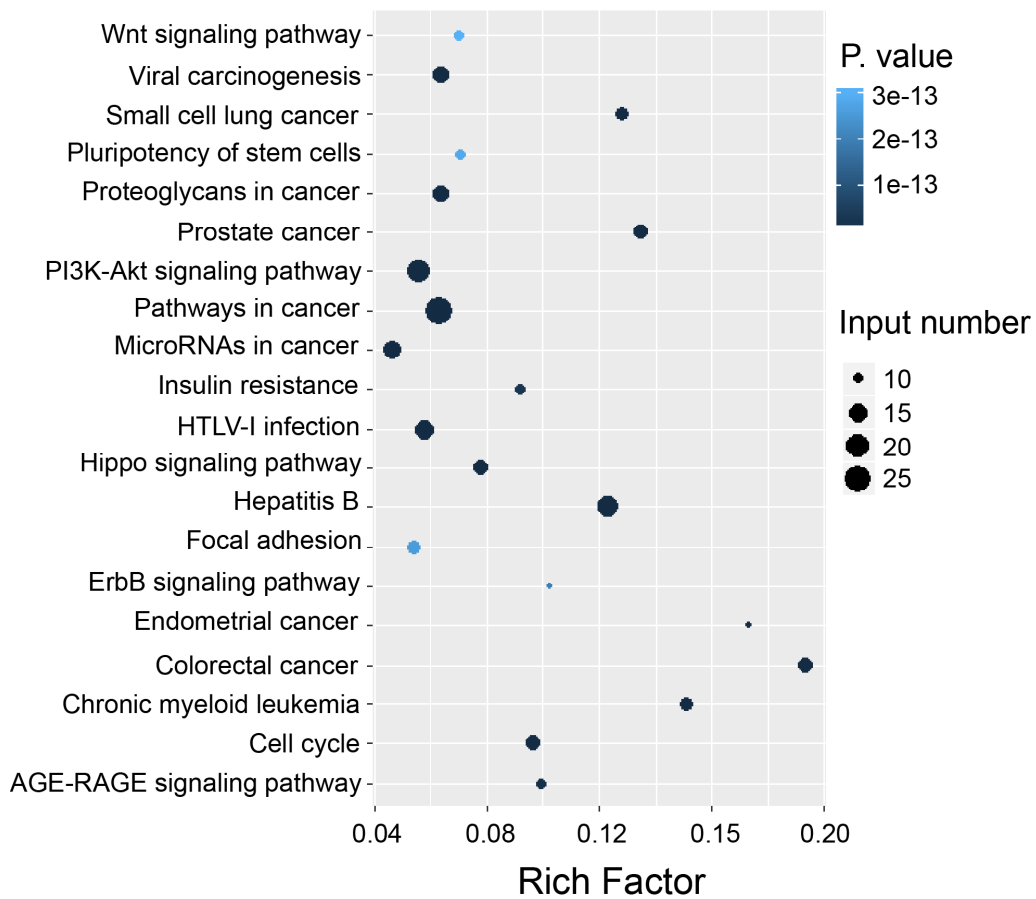

**Figure Supplementary Figure 1.** MicroRNA targeted pathway analysis. Kyoto Encyclopedia of Genes and Genomes database pathway analysis showed that these microRNAs were corresponded to cell cycle, PI3K-Akt, Hippo and AGE-RAGE signaling pathway.
